# Supplementary material
Source: MDPI journal article supplement (https://www.mdpi.com/1424-2818/11/10/184)
Supplement: s1 [file s1]

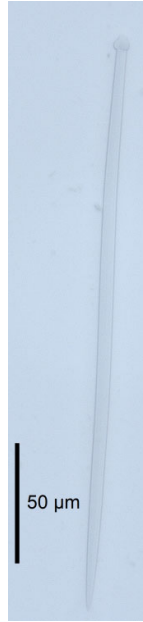

**Figure S1.** Multilobed tylostyle in specimen WAMZ83371.

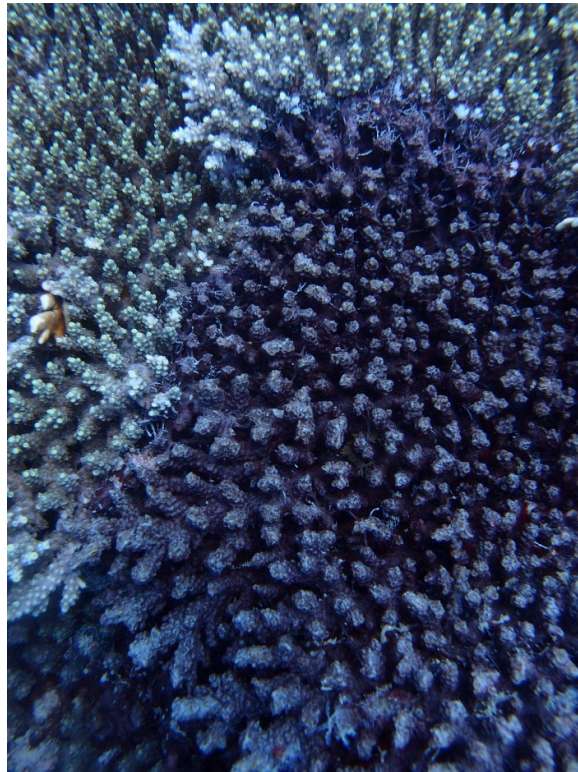

**Figure S2.** Putative *Terpios hoshinota* overgrowing a colony of *Acropora latistella* at Heritage Reef (station 191).

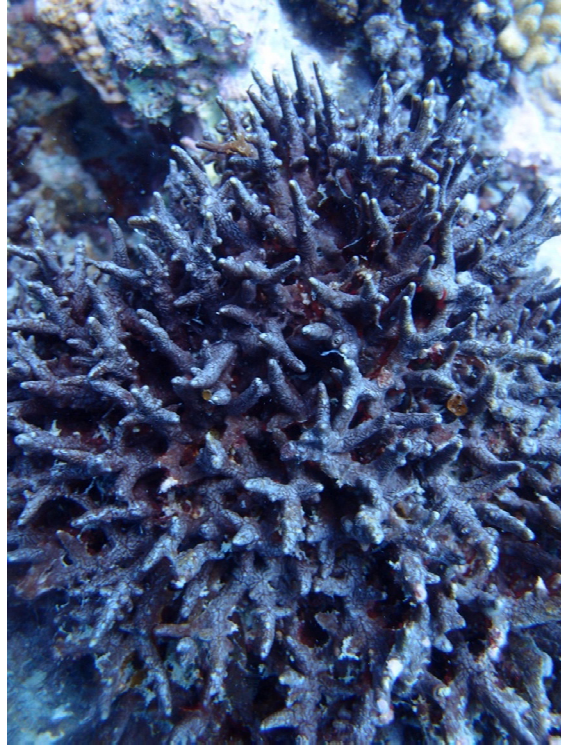

**Figure S3.** Putative *Terpios hoshinota* overgrowing a colony of *Seriatopora hystrix* at Heritage Reef (station 191).
